# Supplementary material for: Functional convalescent plasma antibodies and pre-infusion titers shape the early severe COVID-19 immune response
Source: PubMed Central journal article supplement (PMC8617042; doi:10.1038/s41467-021-27201-y), 2021-11-25
Supplement: 41467_2021_27201_MOESM4_ESM.pdf [file 41467_2021_27201_MOESM4_ESM.pdf]

## **Description of Additional Supplementary Files**

### Supplementary Data 1

This file contains all of the processed antigen-specific antibody data described in the main text and Supplementary materials.
